# Supplementary material
Source: publisher site journal article supplement (https://www.dovepress.com/article/586665)
Supplement: Supplementary file 1 [file 586665%20Supplementary%20Material_3.docx]

**Supporting Information**

**
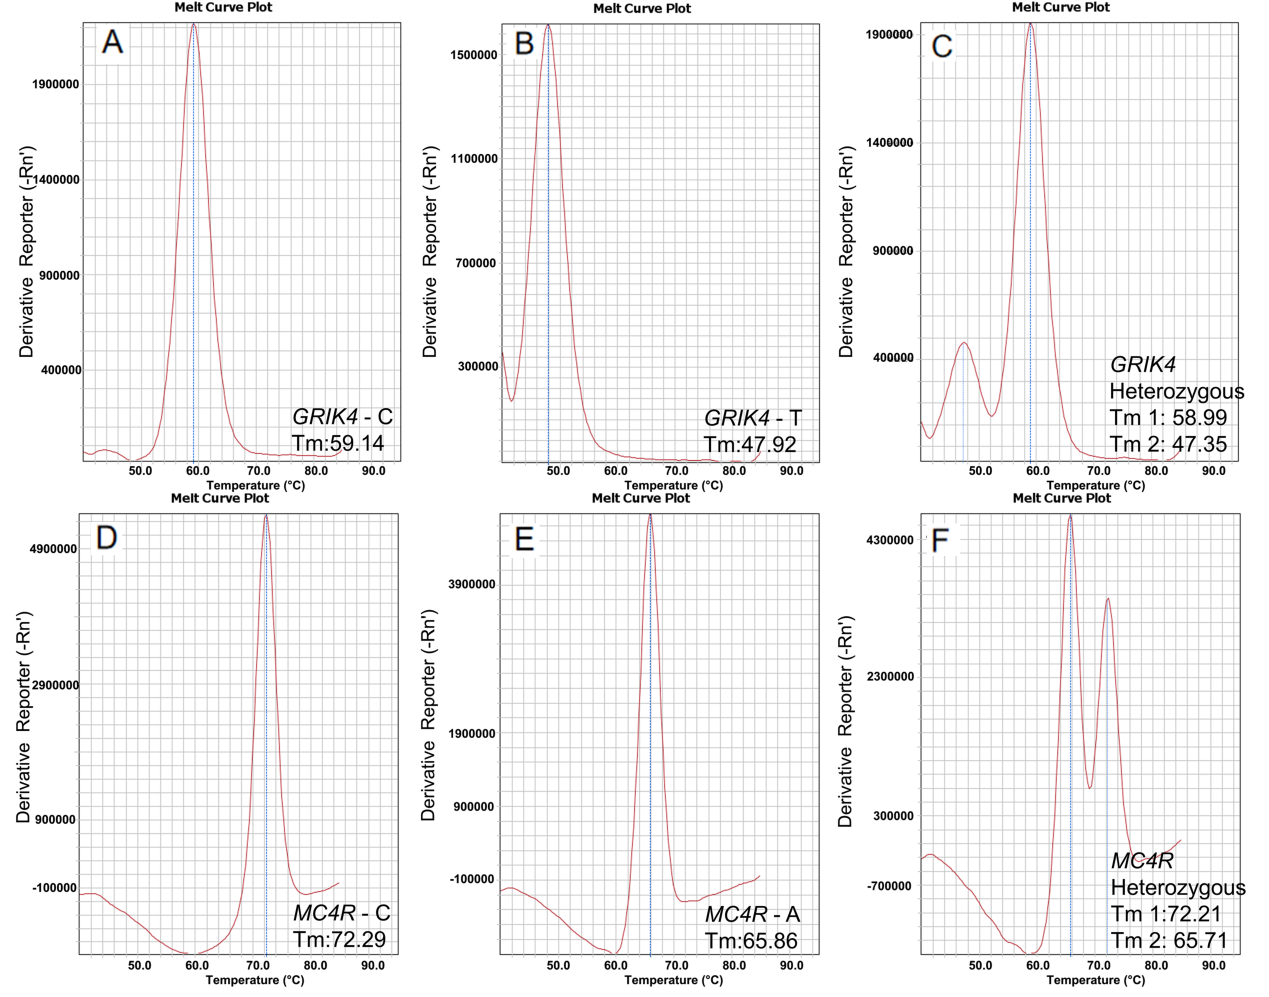
**

**Fig. S1** Representative melting curves for *GRIK4* and *MC4R* genotyping in the ROX channel. (A-C) *GRIK4* C/C (mutant), T/T (wild-type), and C/T (heterozygote). (D–F) *MC4R* C/C (mutant), A/A (wild-type), and C/A (heterozygote).

**
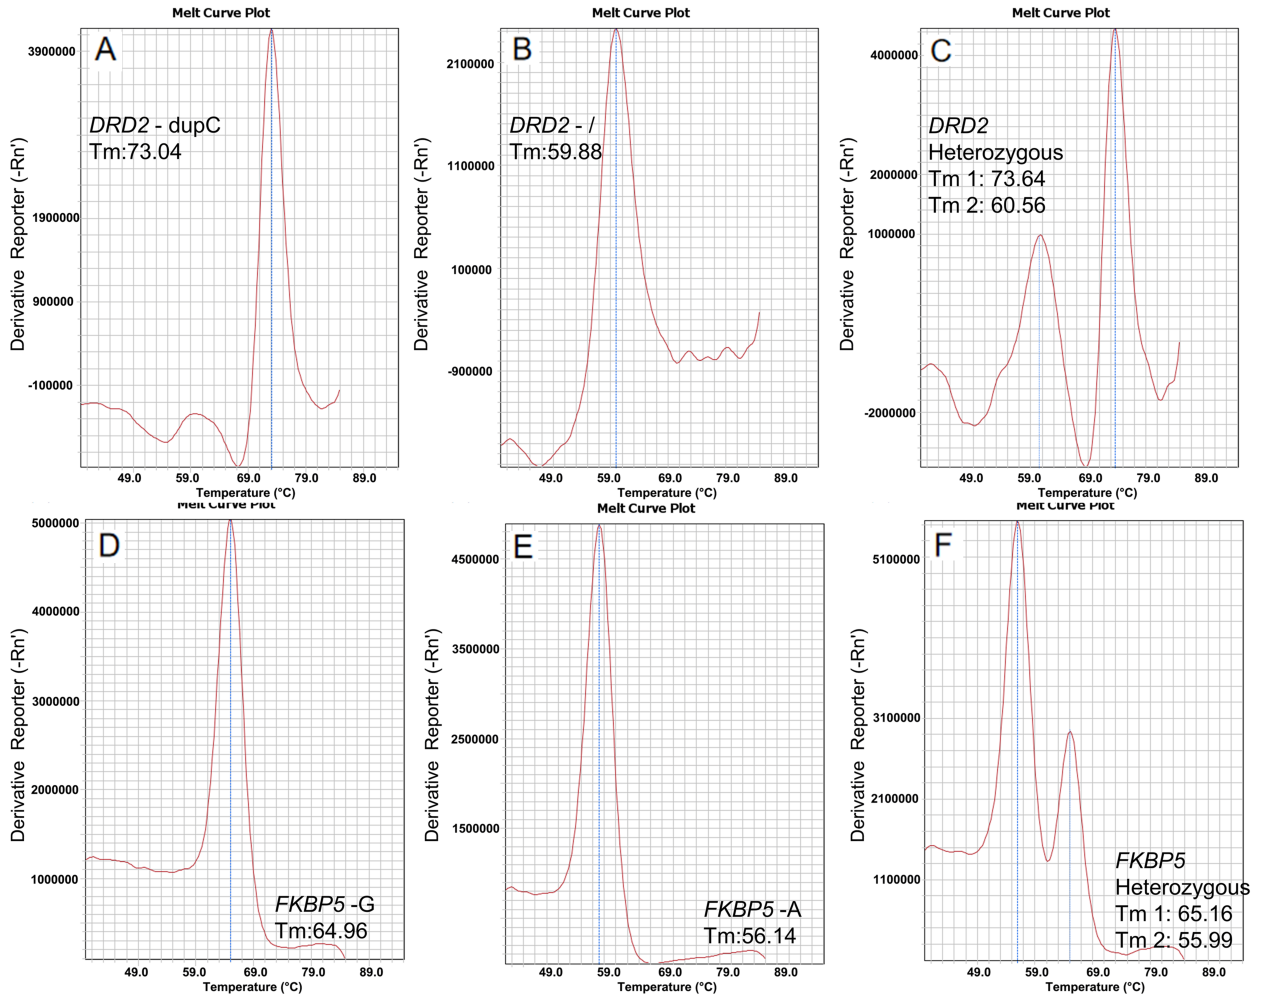
**

**Fig. S2** Representative melting curves for *DRD2* and *FKBP5* genotyping in the CY5 channel. (A-C) *DRD2* dupC/dupC (mutant), / (wild-type), and dupC/- (heterozygote). (D–F) *FKBP5* G/G (mutant), A/A (wild-type), and G/A (heterozygote).


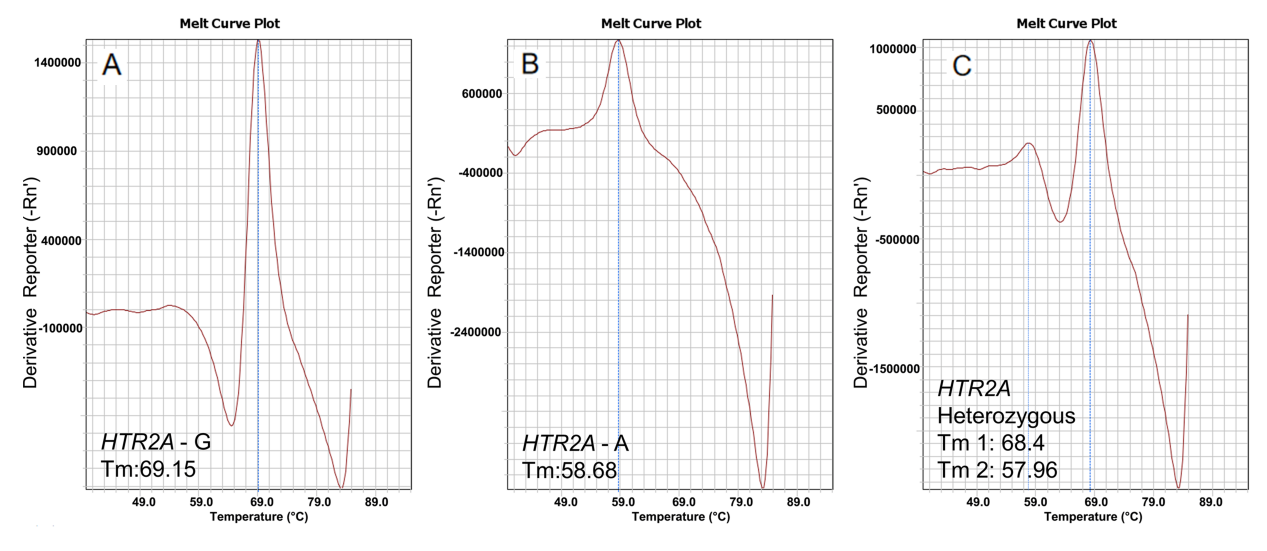


**Fig. S3** Representative melting curves for *HTR2A* genotyping in the VIC channel. (A) G/G (mutant); (B) A/A (wild-type); (C) G/A (heterozygote).


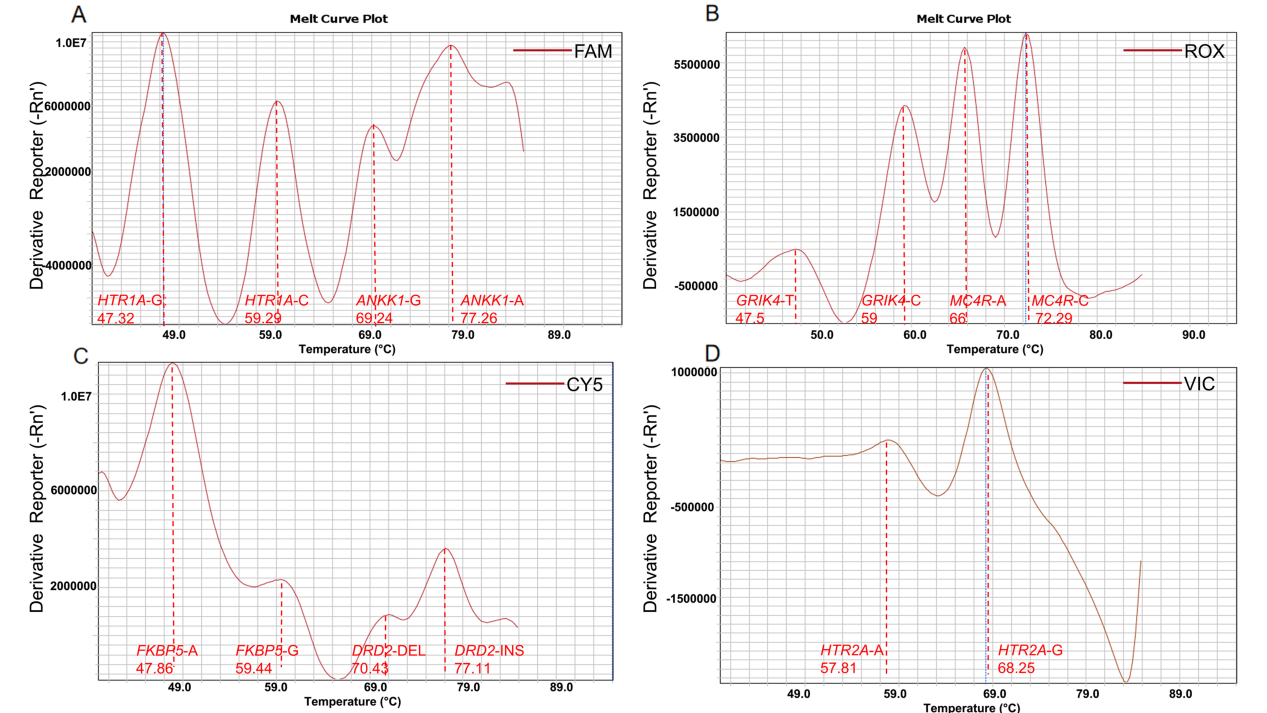


**Fig. S4** Final allocation of the seven target SNPs across four fluorescence channels and their respective allele-specific Tm values in the mFMCA system.(A) *HTR1A* and *ANKK1* variants in the FAM channel; (B) *GRIK4* and *MC4R* variants in the ROX channel; (C) *FKBP5* and *DRD2* variants in the CY5 channel; (D) *HTR2A* variant in the VIC channel.


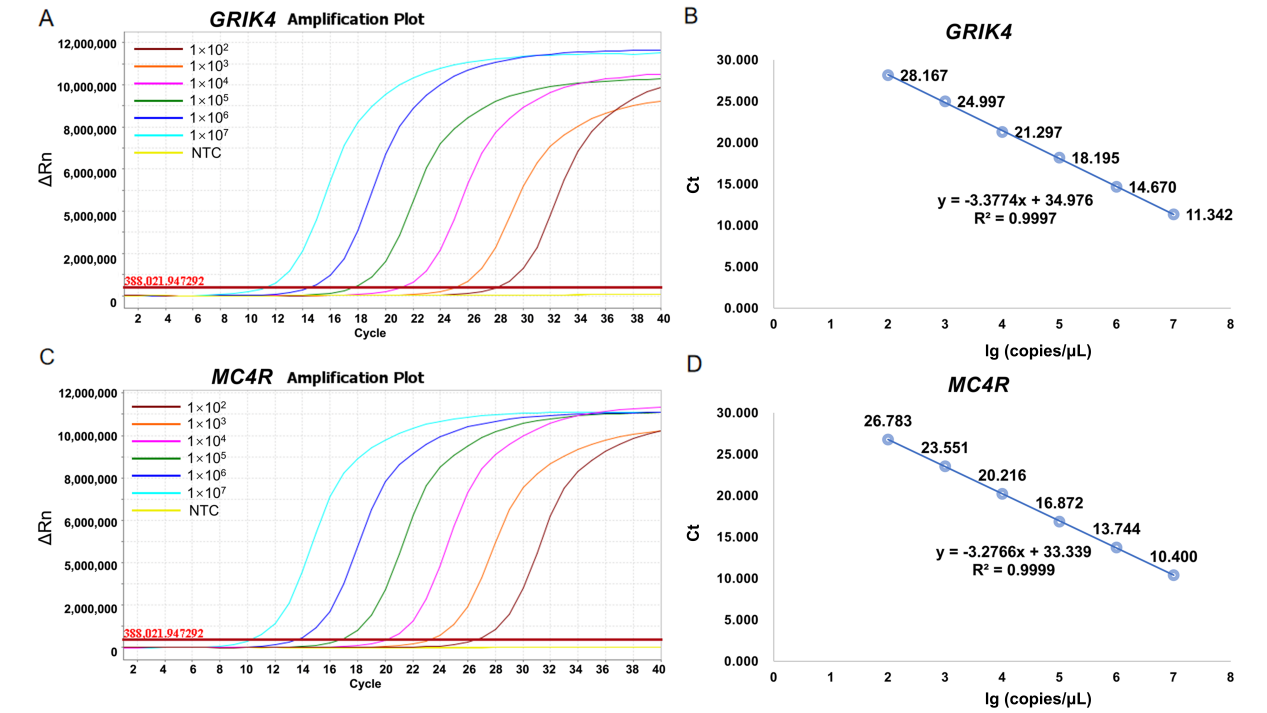


**Fig. S5** Evaluation of amplification efficiency for *GRIK4* and *MC4R* genes in the ROX channel. (A) amplification curves of *GRIK4* gene using a ten-fold serial dilution of plasmid standards; (B) corresponding standard curve of *GRIK4* gene showing the linear relationship between the log of the starting template quantity and the Ct value.(C) amplification curves of *MC4R* gene; (D) corresponding standard curve of *MC4R* gene.


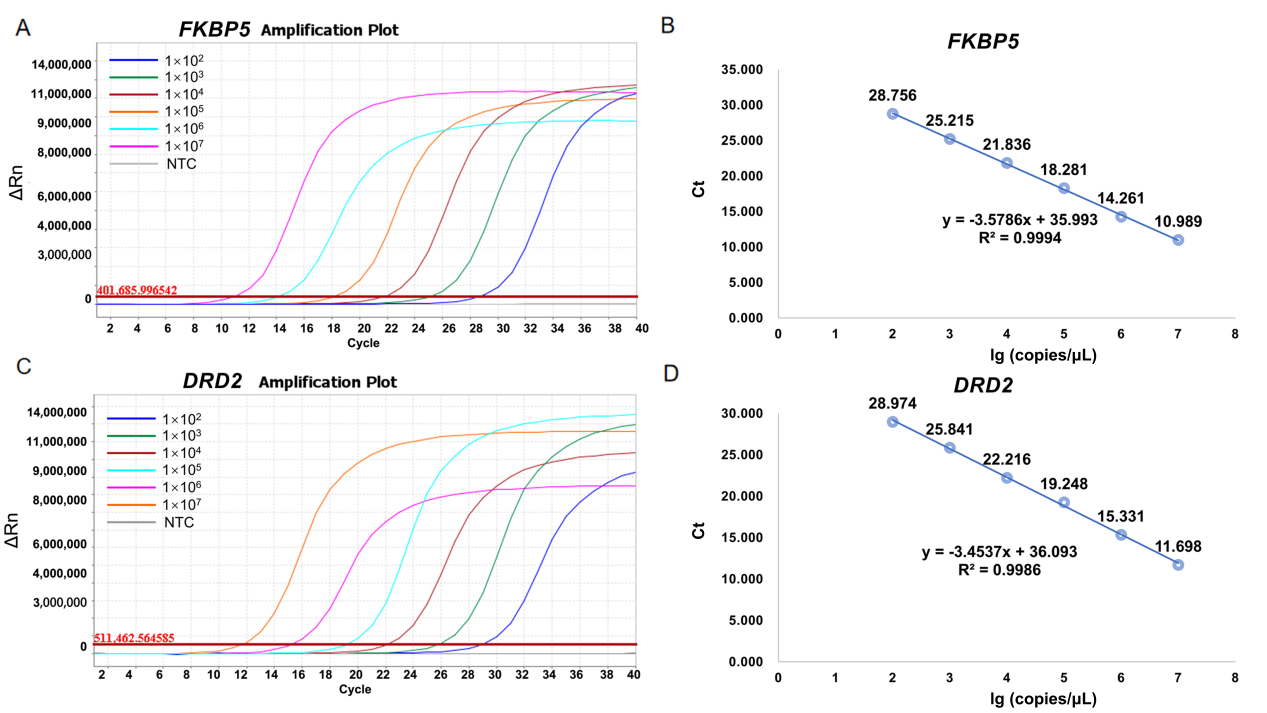


**Fig. S6** Evaluation of amplification efficiency for *FKBP5* and *DRD2* genes in the CY5 channel. (A) amplification curves of *FKBP5* gene using a ten-fold serial dilution of plasmid standards; (B) corresponding standard curve of *FKBP5* gene showing the linear relationship between the log of the starting template quantity and the Ct value.(C) amplification curves of *DRD2* gene; (D) corresponding standard curve of *DRD2* gene.


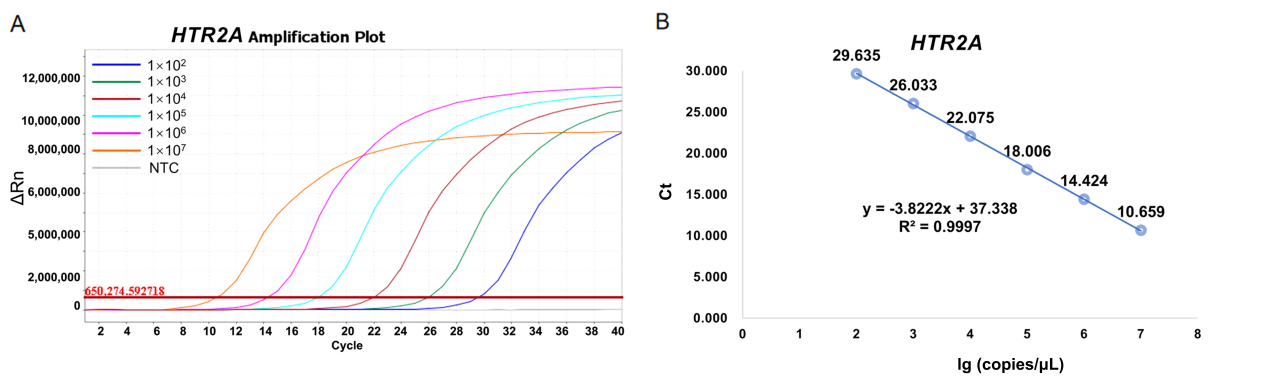


**Fig. S7** Evaluation of amplification efficiency for *HTR2A* gene in the VIC channel. (A) amplification curves of *HTR2A* gene using a ten-fold serial dilution of plasmid standards; (B) corresponding standard curve of *HTR2A* gene showing the linear relationship between the log of the starting template quantity and the Ct value.


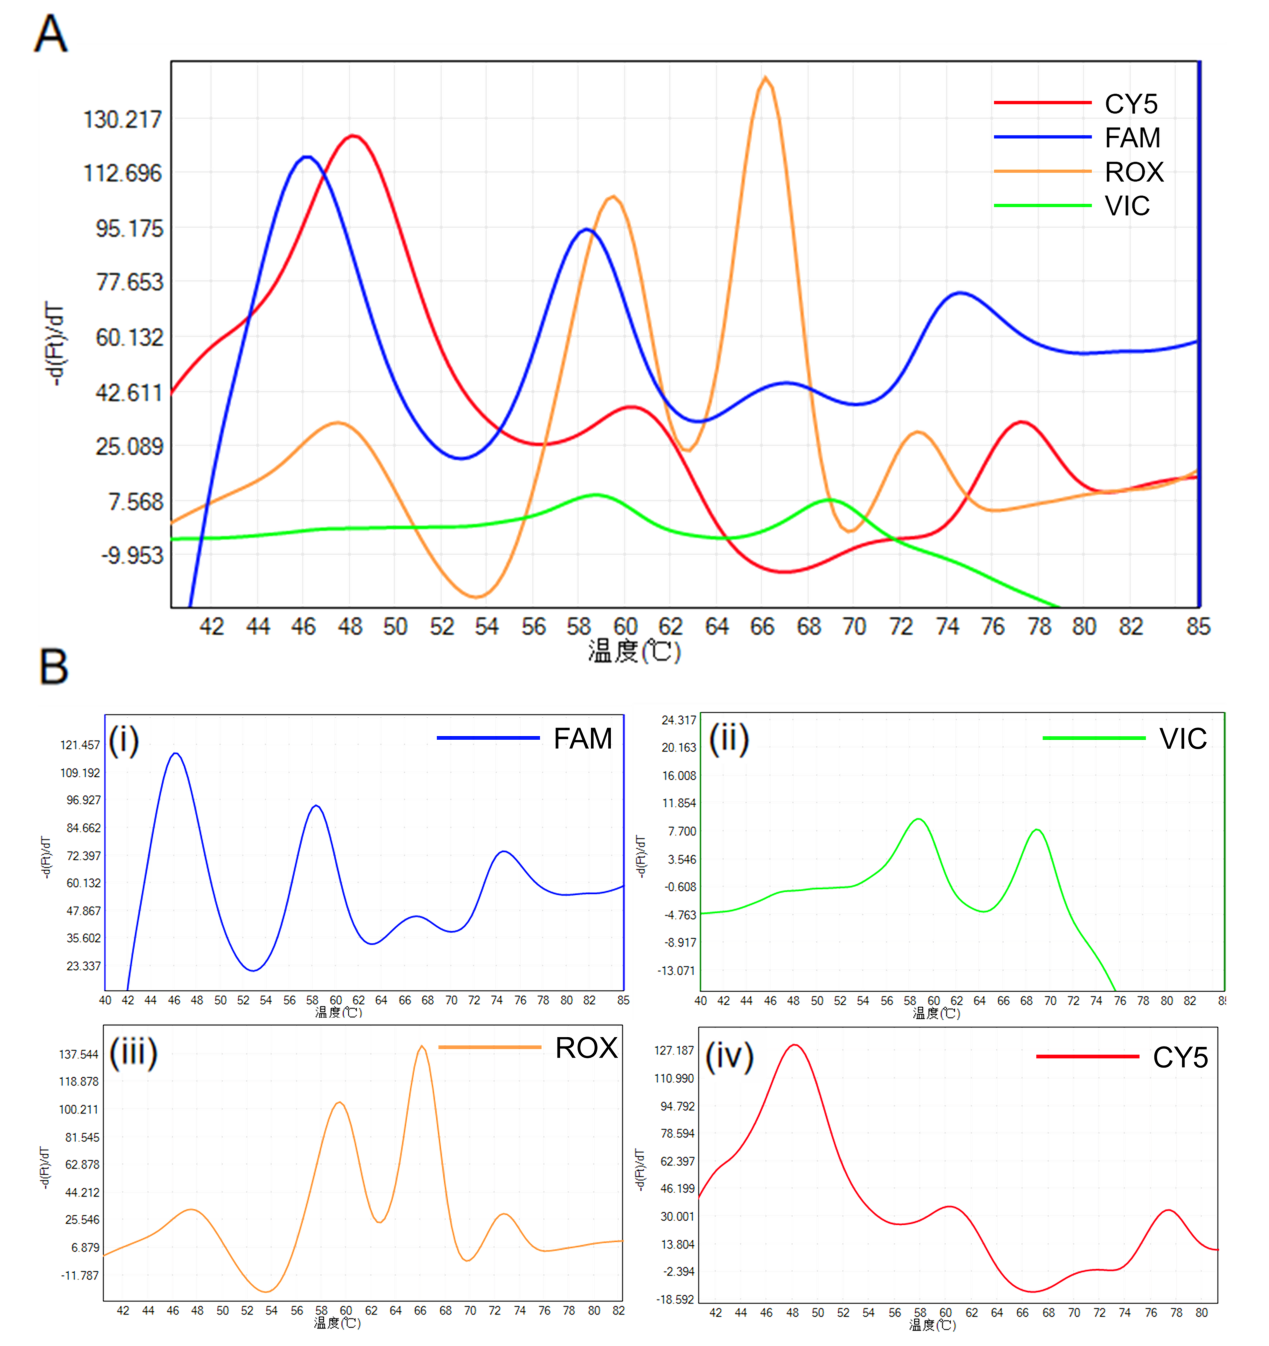


**Fig. S8** Performance of the mFMCA system on the Hongshi 96s qPCR instrument. (A) Integrated multiplex melting curves across all four detection channels, demonstrating simultaneous multi-locus detection. (B) Individual melting profiles for each channel: (i) FAM channel: identification of *HTR1A* and *ANKK1* alleles; (ii) ROX channel: identification of *GRIK4* and *MC4R* alleles; (iii) CY5 channel: identification of *DRD2* and *FKBP5* alleles; (iv) VIC channel: identification of the *HTR2A* allele.


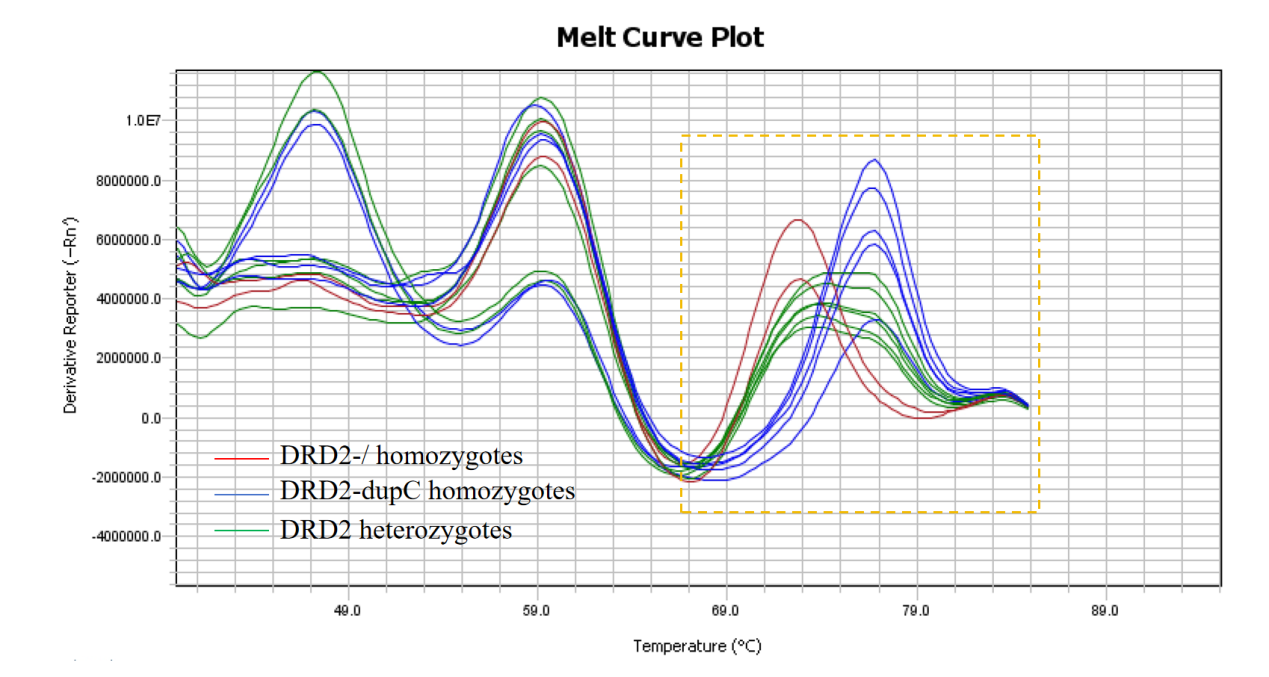


**Fig. S9** Representative melting curves of the *DRD2* SNP locus in selected clinical samples. The figure displays the melting curves in the CY5 fluorescence channel, where the orange dashed box highlights the results for the *DRD2* SNP. For heterozygous samples, the melting peaks of the two alleles tend to coalesce, resulting in a broadened peak width and a less distinct apex. Nevertheless, the genotype can still be readily determined by the characteristic shape of the melting curve.


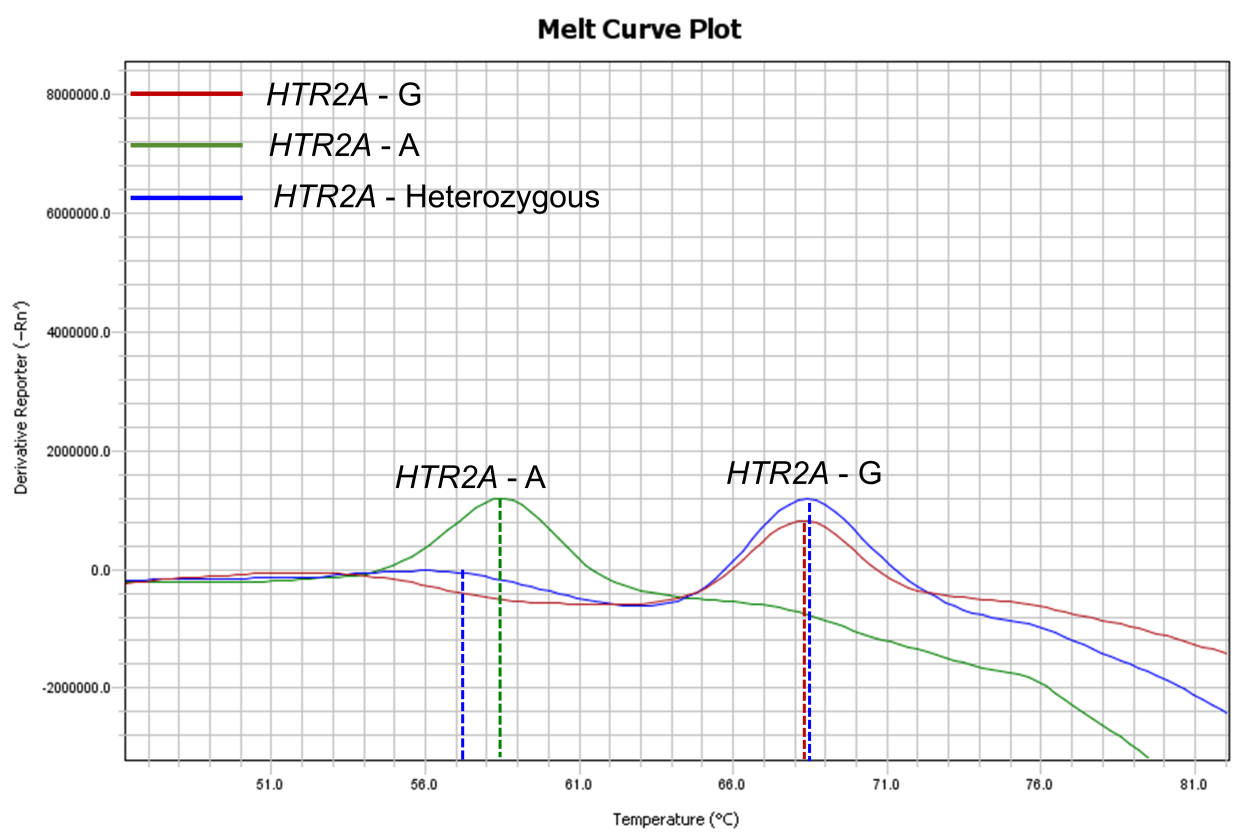


**Fig. S10** Representative melting curves of the *HTR2A* SNP locus in selected clinical samples. The figure displays the melting curves in the VIC fluorescence channel, where the orange dashed box highlights the results for the *HTR2A* SNP. For heterozygous samples,the melting peaks of the two alleles exhibit partial coalescence. Specifically, the G-allele peak partially masks the A-allele peak, resulting in an atypical melting peak morphology with an indistinct apex for the A-allele.Nevertheless, the genotype can still be readily determined by the characteristic shape of the melting curve.


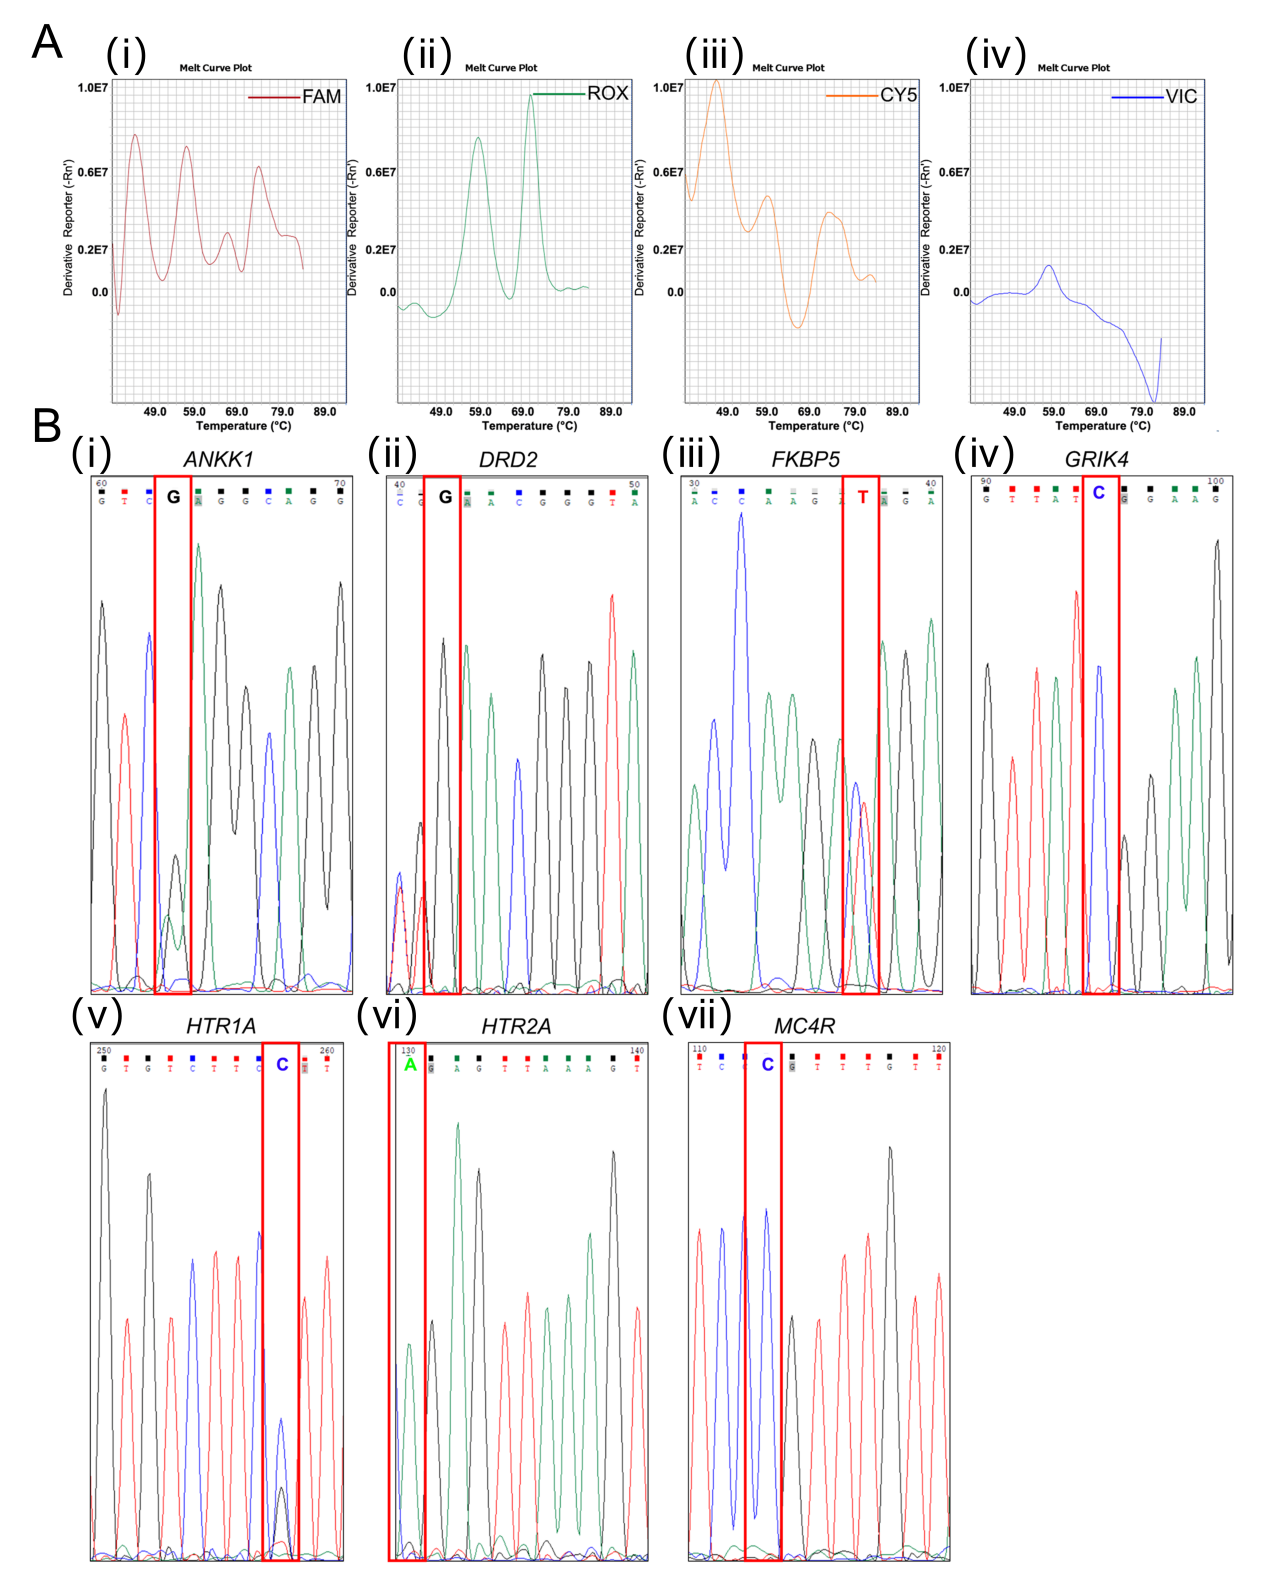


**Fig. S11** Validation of genotyping results for sample No. 201 using the mFMCA assay and Sanger sequencing. (A) Melting curve profiles of the seven target SNPs across four fluorescence channels: (i) FAM channel; (ii) ROX channel; (iii) CY5 channel; and (iv) VIC channel. In each panel, the specific Tm peaks correspond to the genotypes of the dedicated SNPs. (B) Representative Sanger sequencing chromatograms confirming the seven target variants: (i) *ANKK1*; (ii) *DRD2*; (iii) *FKBP5*; (iv) *GRIK4*; (v) *HTR1A*; (vi) *HTR2A*; and (vii) *MC4R*.


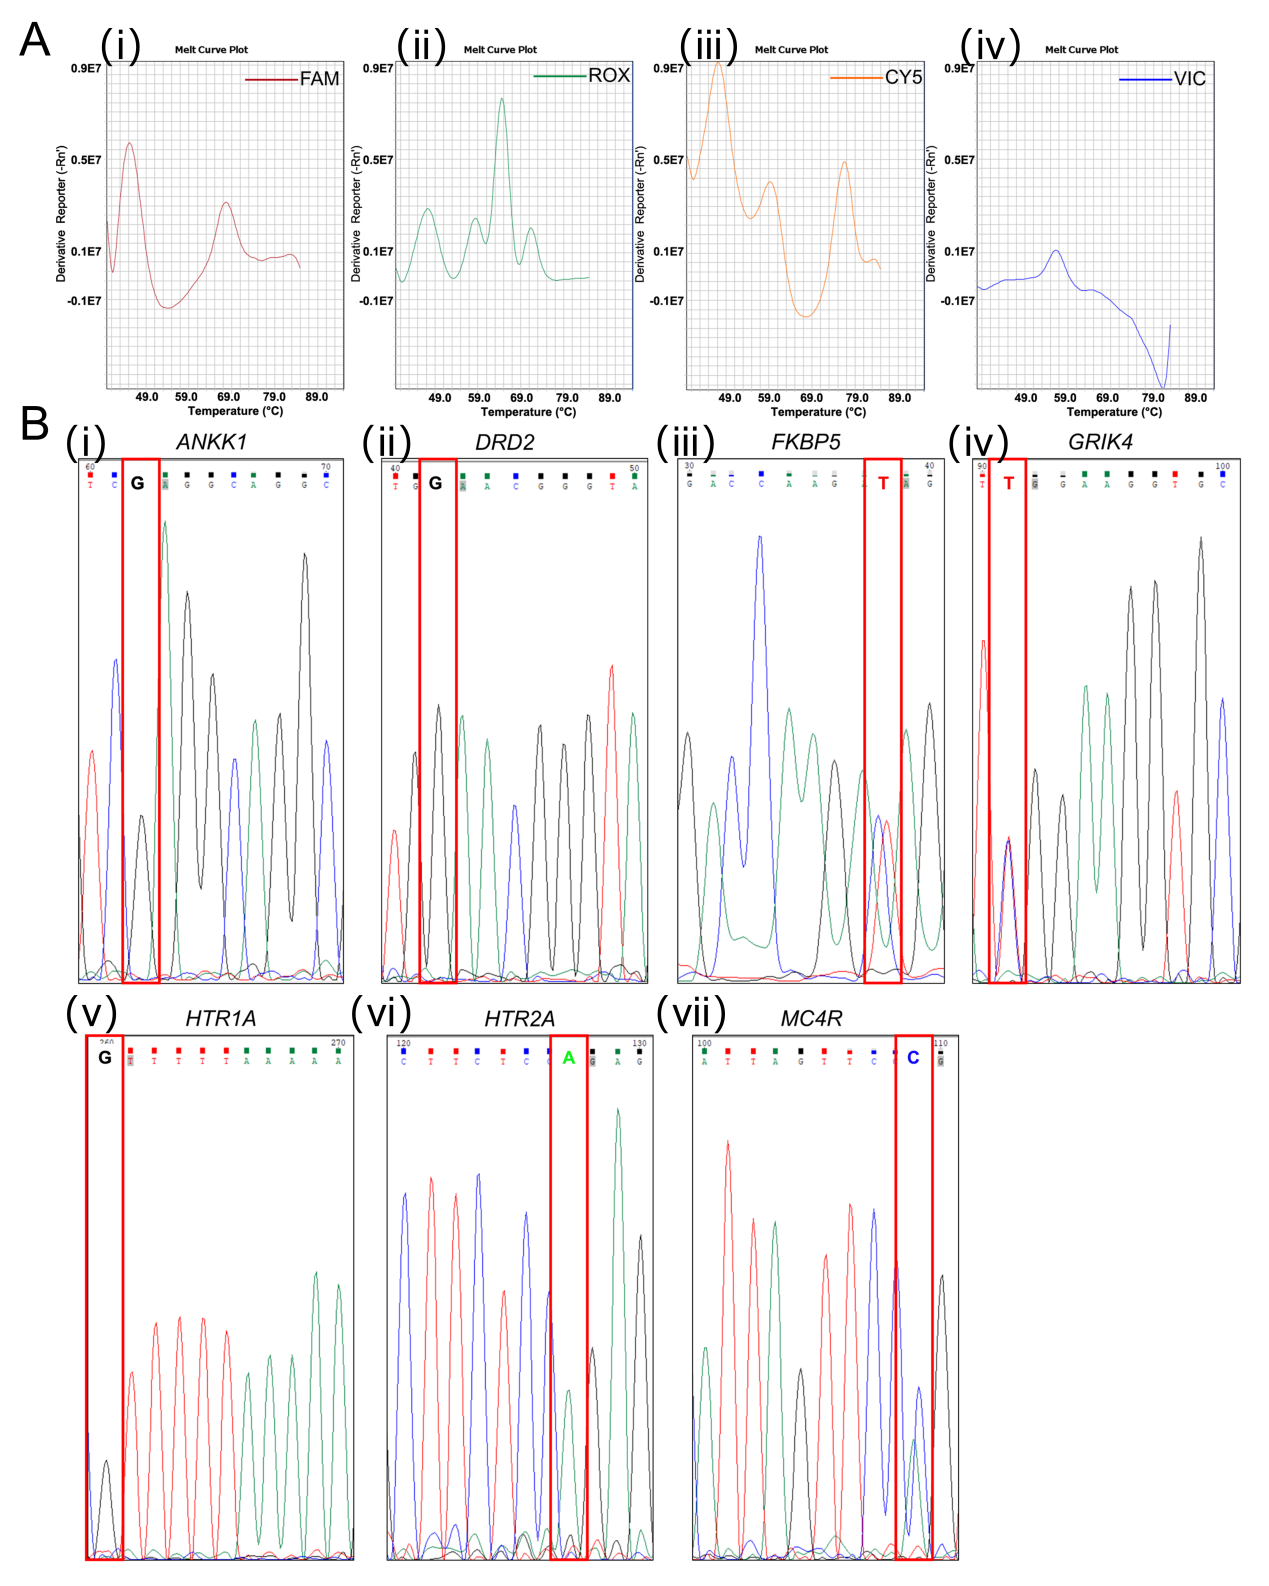


**Fig. S12** Validation of genotyping results for sample No. 226 using the mFMCA assay and Sanger sequencing. (A) Melting curve profiles of the seven target SNPs across four fluorescence channels: (i) FAM channel; (ii) ROX channel; (iii) CY5 channel; and (iv) VIC channel. In each panel, the specific Tm peaks correspond to the genotypes of the dedicated SNPs. (B) Representative Sanger sequencing chromatograms confirming the seven target variants: (i) *ANKK1*; (ii) *DRD2*; (iii) *FKBP5*; (iv) *GRIK4*; (v) *HTR1A*; (vi) *HTR2A*; and (vii) *MC4R*.

**
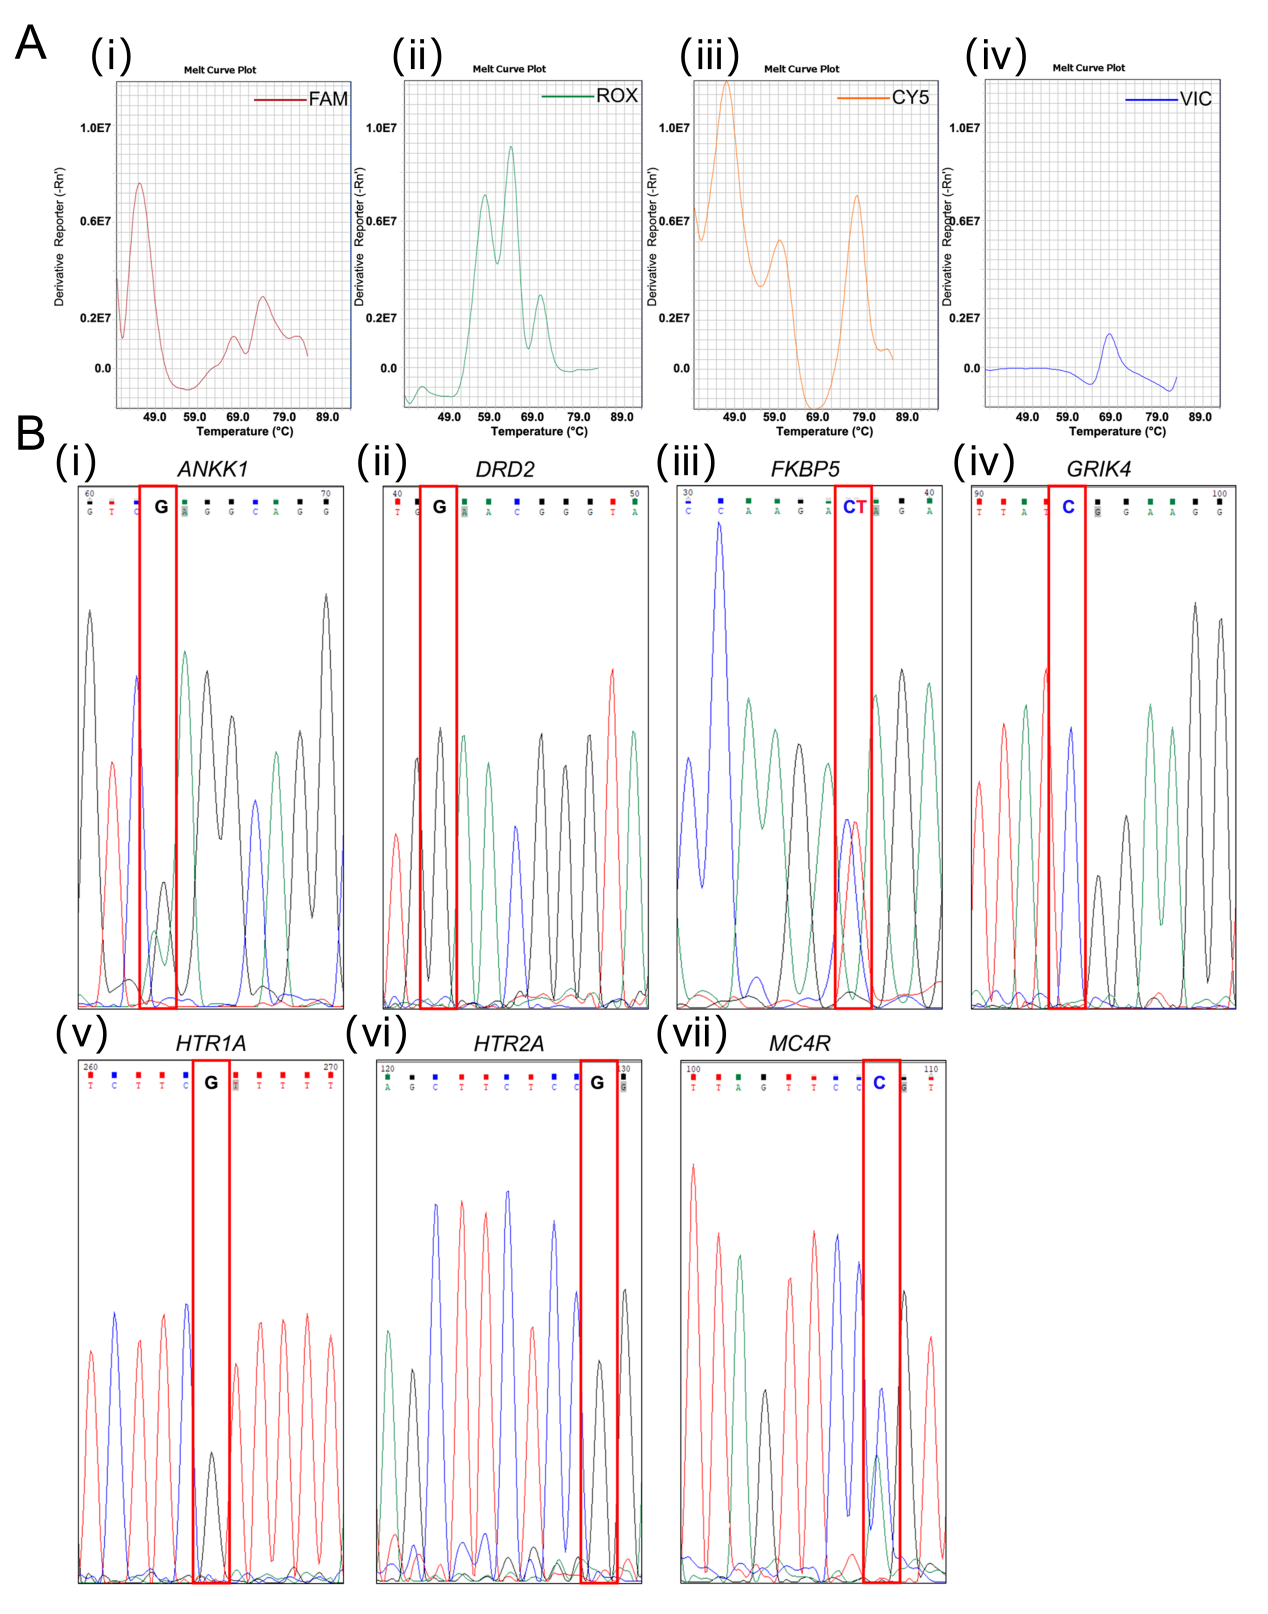
**

**Fig. S13** Validation of genotyping results for sample No. 243 using the mFMCA assay and Sanger sequencing. (A) Melting curve profiles of the seven target SNPs across four fluorescence channels: (i) FAM channel; (ii) ROX channel; (iii) CY5 channel; and (iv) VIC channel. In each panel, the specific Tm peaks correspond to the genotypes of the dedicated SNPs. (B) Representative Sanger sequencing chromatograms confirming the seven target variants: (i) *ANKK1*; (ii) *DRD2*; (iii) *FKBP5*; (iv) *GRIK4;* (v) *HTR1A*; (vi) *HTR2A*; and (vii) *MC4R*.


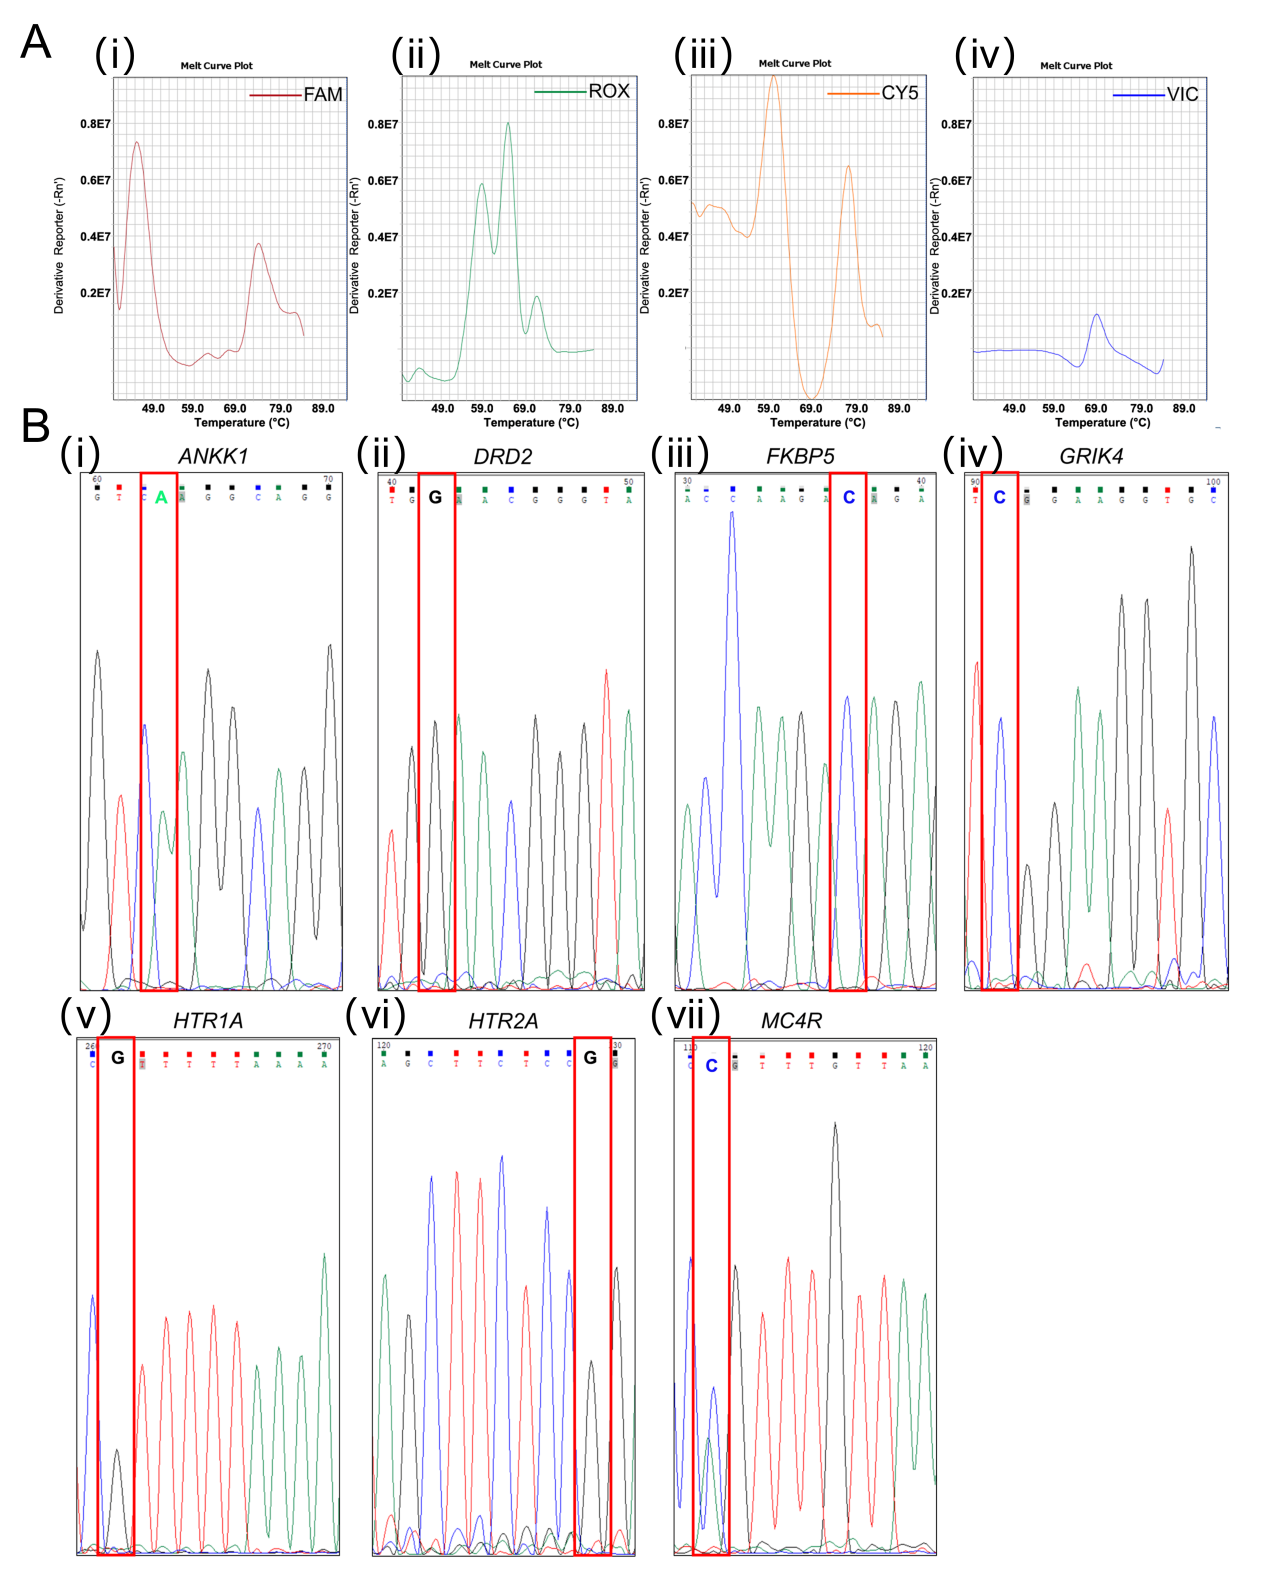


**Fig. S14** Validation of genotyping results for sample No. 279 using the mFMCA assay and Sanger sequencing. (A) Melting curve profiles of the seven target SNPs across four fluorescence channels: (i) FAM channel; (ii) ROX channel; (iii) CY5 channel; and (iv) VIC channel. In each panel, the specific Tm peaks correspond to the genotypes of the dedicated SNPs. (B) Representative Sanger sequencing chromatograms confirming the seven target variants: (i) *ANKK1*; (ii) *DRD2*; (iii) *FKBP5*; (iv) *GRIK4*; (v) *HTR1A*; (vi) *HTR2A*; and (vii) *MC4R*.

**Table S1** Comparison of *T*m values and Δ*T*m for each SNP locus across different real-time PCR platforms.

| **Channel** | **SNP** | **ABI ViiATM 7** | **Hongshi**  **SLAN-96S‌** | **Δ*T*m** |
| --- | --- | --- | --- | --- |
| **FAM** | *HTR1A*-G | 47.32 | 46.08 | 1.24 |
| *HTR1A*-C | 59.29 | 58.35 | 0.94 |
| *ANKK1*-G | 69.24 | 67 | 2.24 |
| *ANKK1*-A | 77.26 | 74.32 | 2.94 |
| **ROX** | *GRIK4*-T | 47.5 | 47.96 | 0.46 |
| *GRIK4*-C | 59 | 59.6 | 0.6 |
| *MC4R*-A | 66 | 66.24 | 0.24 |
| *MC4R*-C | 72.29 | 72.75 | 0.46 |
| **CY5** | *FKBP5*-A | 47.86 | 48.31 | 0.45 |
| *FKBP5*-G | 59.44 | 60.99 | 1.55 |
| *DRD2*-/ | 70.43 | 70.9 | 0.47 |
| *DRD2*-dup C | 77.11 | 77.28 | 0.17 |
| **VIC** | *HTR2A*-A | 57.81 | 58.6 | 0.79 |
| *HTR2A*-G | 68.25 | 69.15 | 0.9 |

**Notes:** Δ*T*m represents the absolute difference in mean *T*m values between the two tested devices; “/ “ represents the *DRD2* wild-type allele(non-dup C) .

**Table S2** Summary of allele-specific mean *T*m values and standard deviations stratified by genotypes in both the training and validation cohorts

| **Gene** | **Channel** | **Allele** | **Training cohort**  **(n=98)** | | **Validation cohort (n=124)** | |
| --- | --- | --- | --- | --- | --- | --- |
| **Mean *T*m, ℃** | **SD,℃** | **Mean *T*m, ℃** | **SD,℃** |
| ***HTR1A*** | FAM | hom C | 57.43 | 0.35 | 58.13 | 0.13 |
| hom G | 45.66 | 0.3 | 46.17 | 0.23 |
| het C | 57.68 | 0.31 | 58.33 | 0.14 |
| het G | 45.52 | 0.26 | 46.06 | 0.22 |
| ***ANKK1*** | FAM | hom A | 73.72 | 0.56 | 73.43 | 0.52 |
| hom G | 67.77 | 0.24 | 67.27 | 1.08 |
| het A | 74.17 | 0.28 | 73.91 | 0.77 |
| het G | 66.91 | 0.88 | 67.06 | 1.19 |
| ***GRIK4*** | ROX | hom T | 48.19 | 0.25 | 48.15 | 0.09 |
| hom C | 59.02 | 0.37 | 59.45 | 0.17 |
| het T | 47.65 | 0.24 | 48.11 | 0.16 |
| het C | 59.12 | 0.37 | 59.52 | 0.20 |
| ***MC4R*** | ROX | hom A | 65.67 | 0.42 | 65.89 | 0.16 |
| hom C | 71.85 | 0.55 | 72.31 | 0.20 |
| het A | 65.18 | 0.65 | 65.90 | 0.16 |
| het C | 71.83 | 0.72 | 72.48 | 0.14 |
| ***DRD2*** | CY5 | hom / | 72.9 | 0.11 | 72.91 | 0.23 |
| hom dup C | 76.84 | 0.18 | 76.91 | 0.22 |
| het / | 73.26 | 0.59 | 72.13 | 0.23 |
| het dup C | 76.89 | 0.26 | 77.11 | 0.31 |
| ***FKBP5*** | CY5 | hom A | 47.83 | 0.13 | 48.21 | 0.29 |
| hom G | 59.68 | 0.45 | 60.31 | 0.27 |
| het A | 47.62 | 0.49 | 48.00 | 0.25 |
| het G | 59.96 | 0.65 | 60.68 | 0.23 |
| ***HTR2A*** | VIC | hom A | 58.89 | 0.28 | 59.27 | 0.17 |
| hom G | 69.04 | 0.46 | 69.58 | 0.13 |
| het A | 56.51 | 1.17 | 57.61 | 0.47 |
| het G | 68.77 | 0.41 | 69.19 | 0.13 |

**Notes:** hom, homozygote; het, heterozygote; “/ “ represents the *DRD2* wild-type allele(non-dup C).

**Table S3** Diagnostic performance metrics of the mFMCA assay for 7 SNP loci compared with Sanger sequencing in the validation cohort

| **SNP** | **Total samples** | **concordance** | **sensitivity(95%CI)** | **Specificity(95%CI)** | **Cohen’s Kappa (κ)** |
| --- | --- | --- | --- | --- | --- |
| **ANKK1 G>A** | 124 | 100.00% | 100% (96.3–100.0) | 100% (96.3–100.0) | 1.0 |
|
|
| ***DRD2* dup C** | 124 | 100.00% | 100% (96.3–100.0) | 100% (96.3–100.0) | 1.0 |
|
|
| ***FKBP5 G>A*** | 124 | 100.00% | 100% (96.3–100.0) | 100% (96.3–100.0) | 1.0 |
|
|
| ***GRIK4 C>T*** | 124 | 100.00% | 100% (96.3–100.0) | 100% (96.3–100.0) | 1.0 |
|
|
| ***HTR1A G>C*** | 124 | 100.00% | 100% (96.3–100.0) | 100% (96.3–100.0) | 1.0 |
|
|
| ***HTR2A G>A*** | 124 | 100.00% | 100% (96.3–100.0) | 100% (96.3–100.0) | 1.0 |
|
|
| ***MC4R C>A*** | 124 | 100.00% | 100% (96.3–100.0) | 100% (96.3–100.0) | 1.0 |
|
|

**Table S4** Distribution of genotypes and allele frequencies for the seven target SNPs in the training cohort (n=98)

| **SNP** | **Genotypes** | **Number of genotype carriers (n)** | **Genotype Frequency (%)** | **Alleles** | **Number of allele carriers (n)** | **Allele Frequency (%)** |
| --- | --- | --- | --- | --- | --- | --- |
| ***ANKK1*** | AA | 17 | 17.35% | A | 53 | 35.71% |
| **G>A** | AG | 36 | 36.73% | G | 81 | 64.29% |
| GG | 45 | 45.92% |  |  |  |
| DRD2 dup C | / | 6 | 6.12% | / | 22 | 14.29% |
| Ins C | 16 | 16.33% | C | 92 | 85.71% |
| Ins CC | 76 | 77.55% |  |  |  |
| ***FKBP5 G>A*** | GG | 53 | 54.08% | G | 94 | 75.00% |
| GA | 41 | 41.84% | A | 45 | 25.00% |
| AA | 4 | 4.08% |  |  |  |
| ***GRIK4 C>T*** | TT | 2 | 2.04% | T | 32 | 17.35% |
| TC | 30 | 30.61% | C | 96 | 82.65% |
| CC | 66 | 67.35% |  |  |  |
| ***HTR1A G>C*** | CC | 9 | 9.18% | C | 41 | 25.51% |
| CG | 32 | 32.65% | G | 89 | 74.49% |
| GG | 57 | 58.16% |  |  |  |
| ***HTR2A G>A*** | GG | 29 | 29.59% | G | 75 | 53.06% |
| GA | 46 | 46.94% | A | 69 | 46.94% |
| AA | 23 | 23.47% |  |  |  |
| ***MC4R C>A*** | AA | 7 | 7.14% | A | 46 | 27.04% |
| AC | 39 | 39.80% | C | 91 | 72.96% |
| CC | 52 | 53.06% |  |  |  |

**Note:** “/ “ represents the *DRD2* wild-type allele (non-dup C) ; Allele frequencies were calculated based on the standard co-dominant model according to Mendelian principles.

**Table S5** Detailed genotyping results for the four representative clinical samples (No. 201, 226, 243, and 279).

| **Sample ID** | ***ANKK1***  **G>A** | ***DRD2***  **dup C** | ***FKBP5* G>A** | ***GRIK4***  **C>T** | ***HTR1A***  **G>C** | ***HTR2A***  **G>A** | ***MC4R***  **C>A** |
| --- | --- | --- | --- | --- | --- | --- | --- |
| **201** | GA | CC | AG | CC | GC | AA | CC |
| **226** | GG | CC | AG | CT | GG | AA | CA |
| **243** | GA | CC | AG | CC | GG | GG | CA |
| **279** | AA | CC | GG | CC | GG | GG | CA |
